# Supplementary material for: Greener chemistry in analytical sciences: from green solvents to applications in complex matrices. Current challenges and future perspectives: a critical review
Source: Royal Society of Chemistry journal article supplement (doi:10.1039/d3an00498h), 2023-01-01
Supplement: d3an00498h3.pdf [file d3an00498h3.pdf]

## Supplementary Material

### Greener Chemistry in Analytical Sciences - from Green Solvents to Applications in Complex Matrices. Current Challenges and Future Perspectives: A Critical Review

Slavica Ražić,<sup>\*a</sup> Jelena Arsenijević,<sup>b</sup> Svetlana Đogo Mračević,<sup>a</sup> Jasmina Mušović<sup>c</sup> and Tatjana Trtić-Petrović<sup>c</sup>

<sup>a</sup>University of Belgrade – Faculty of Pharmacy, Department of Analytical Chemistry, Vojvode Stepe 450, 11221, Belgrade, Serbia. E-mail: slavica.razic@pharmacy.bg.ac.rs

<sup>b</sup>University of Belgrade – Faculty of Pharmacy, Department of Pharmacognosy, Vojvode Stepe 450, 11221, Belgrade, Serbia

<sup>c</sup>University of Belgrade - Vinča Institute of Nuclear Sciences, National Institute of the Republic of Serbia, Laboratory of Physics, Mike Petrović Alasa 12-14, Belgrade, Serbia

#### Figure and Tables

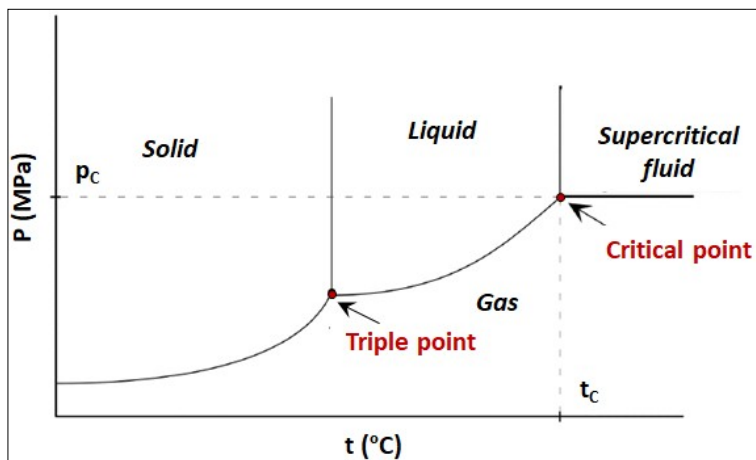

Fig. S1 Phase diagram of a pure single-component system.

**Table S1** Parameters for the NEMI diagram.

| Principle                                             | Description | Color |
|-------------------------------------------------------|-------------|-------|
| Persistent, bioaccumulative, toxic chemicals are used | Yes         | White |
|                                                       | No          | Green |
| Hazardous chemicals are used                          | Yes         | White |
|                                                       | No          | Green |
| The pH value of the sample is in the range of 2–12    | Yes         | Green |
|                                                       | No          | White |
| The amount of generated waste does exceed 50 g        | Yes         | White |
|                                                       | No          | Green |

**Table S2** The penalty points (PPs) to calculate analytical Eco-Scale.

| Reagents     |                     | Total PP              |   |
|--------------|---------------------|-----------------------|---|
| Amount       | <10 mL (g)          | 1                     |   |
|              | 10–100 mL (g)       | 2                     |   |
|              | >100 mL (g)         | 3                     |   |
|              | Hazard              | None                  | 0 |
|              |                     | Less severe hazard    | 1 |
|              |                     | More severe hazard    | 2 |
|              |                     | Amount PP x Hazard PP |   |
| Instruments  | Energy              | <0.1 kWh per sample   | 0 |
|              |                     | <1.5 kWh per sample   | 1 |
|              |                     | >1.5 kWh per sample   | 2 |
|              | Occupational hazard |                       | 0 |
|              |                     |                       | 3 |
|              | Waste               | None                  | 0 |
|              |                     | <1 mL (g)             | 1 |
|              |                     | 1–10 mL (g)           | 3 |
|              |                     | >10 mL (g)            | 5 |
|              |                     | Recycling             | 0 |
| Degradation  |                     | 1                     |   |
| Passivation  |                     | 2                     |   |
| No treatment | 3                   |                       |   |

**Table S3** Green Analytical Procedure Index parameters description.

| Category                | Description          | Color  |
|-------------------------|----------------------|--------|
| Sample Collection (1)   | In-line              | Green  |
|                         | On-line or at-line   | Yellow |
|                         | Off-line             | red    |
| Sample Preservation (2) | None                 | Green  |
|                         | Chemical or physical | Yellow |
|                         | Physico-chemical     | Red    |
| Sample Transport (3)    | None                 | Green  |
|                         | Required             | Yellow |
|                         | -                    | Red    |
| Sample Storage (4)      | None                 | Green  |

|                                           |                                                                                              |        |
|-------------------------------------------|----------------------------------------------------------------------------------------------|--------|
|                                           | Under normal conditions                                                                      | Yellow |
|                                           | Under special conditions                                                                     | Red    |
| Type of method: direct or indirect (5)    | No sample preparation                                                                        | Green  |
|                                           | Simple procedures, eg. filtration, decantation                                               | Yellow |
| The scale of extraction (6)               | Extraction required                                                                          | Red    |
|                                           | Nano-extraction                                                                              | Green  |
|                                           | Micro-extraction                                                                             | Yellow |
| Solvents/reagents used (7)                | Macro-extraction                                                                             | Red    |
|                                           | Solvent-free methods                                                                         | Green  |
|                                           | Green solvents/reagents used                                                                 | Yellow |
| Additional treatments (8)                 | Non-green solvents/reagents used                                                             | Red    |
|                                           | None                                                                                         | Green  |
|                                           | Simple treatments (clean up, solvent removal)                                                | Yellow |
| Reagent and solvents: Amount (9)          | Advanced treatments                                                                          | Red    |
|                                           | <10 mL (< 10 g)                                                                              | Green  |
|                                           | 10–100 mL (10–100 g)                                                                         | Yellow |
| Reagent and solvents: Health hazard (10)  | >100 mL (> 100 g)                                                                            | Red    |
|                                           | Slightly toxic, slight irritant; NFPA health hazard score = 0 or 1.                          | Green  |
|                                           | Moderately toxic; could cause temporary incapacitation; NFPA = 2 or 3.                       | Yellow |
| Reagents and solvents: Safety hazard (11) | Serious injury on short-term exposure; known or suspected small animal carcinogen; NFPA = 4. | Red    |
|                                           | The highest NFPA flammability or instability score of 0 or 1. No special hazards.            | Green  |
|                                           | Highest NFPA flammability or instability score of 2 or 3, or a special hazard is used.       | Yellow |
| Instrumentation: Energy (12)              | Highest NFPA flammability or instability score of 4.                                         | Red    |
|                                           | ≤0.1 kWh per sample                                                                          | Green  |
|                                           | ≤1.5 kWh per sample                                                                          | Yellow |
| Instrumentation: Occupational hazard (13) | >1.5 kWh per sample                                                                          | Red    |
|                                           | Hermetic sealing of analytical process                                                       | Green  |
|                                           | -                                                                                            | Yellow |
| Waste (14)                                | Emission of vapours to the atmosphere                                                        | Red    |
|                                           | <1 mL (< 1 g)                                                                                | Green  |
|                                           | 1–10 mL (1–10 g)                                                                             | Yellow |
| Waste treatment (15)                      | >10 mL (< 10 g)                                                                              | Red    |
|                                           | Recycling                                                                                    | Green  |
|                                           | Degradation, passivation                                                                     | Yellow |
|                                           | No treatment                                                                                 | Red    |

Circle in the middle of GAPI: Procedure for qualification and quantification

No circle in the middle of GAPI: Procedure only for qualification

**Table S4** AGREE tool parameters description.

| Category                                        | Description                                                                    | Score                                                                                                                                        |
|-------------------------------------------------|--------------------------------------------------------------------------------|----------------------------------------------------------------------------------------------------------------------------------------------|
| 1. Sample pretreatment activities               | Remote sensing without sample damage                                           | 1.00                                                                                                                                         |
|                                                 | Remote sensing with little physical damage                                     | 0.95                                                                                                                                         |
|                                                 | Noninvasive analysis                                                           | 0.90                                                                                                                                         |
|                                                 | In-field sampling and direct analysis                                          | 0.85                                                                                                                                         |
|                                                 | In-field sampling and on-line analysis                                         | 0.78                                                                                                                                         |
|                                                 | On-line analysis                                                               | 0.70                                                                                                                                         |
|                                                 | At-line analysis                                                               | 0.60                                                                                                                                         |
|                                                 | Off-line analysis                                                              | 0.48                                                                                                                                         |
|                                                 | External sample pre-and treatment and batch analysis (reduced number of steps) | 0.30                                                                                                                                         |
|                                                 | External sample pre-and treatment and batch analysis (a large number of steps) | 0.00                                                                                                                                         |
| 2. Type of analysis (sample size mg or $\mu$ L) | Ultramicroanalysis (<1)                                                        | 1.00                                                                                                                                         |
|                                                 | Microanalysis (1–10)                                                           | = $-0.142 \times \ln$ (amount of sample in g or mL) +                                                                                        |
|                                                 | Semimicroanalysis (10–100)                                                     |                                                                                                                                              |
|                                                 | Macroanalysis (>100)                                                           | 0.65                                                                                                                                         |
| 3. Instrumental Position                        | In-line                                                                        | 1.00                                                                                                                                         |
|                                                 | On-line                                                                        | 0.66                                                                                                                                         |
|                                                 | At-line                                                                        | 0.33                                                                                                                                         |
|                                                 | Off-line                                                                       | 0.00                                                                                                                                         |
| 4. Number of steps in analytical process        | Three or fewer                                                                 | 1.00                                                                                                                                         |
|                                                 | Four                                                                           | 0.80                                                                                                                                         |
|                                                 | Five                                                                           | 0.60                                                                                                                                         |
|                                                 | Six                                                                            | 0.40                                                                                                                                         |
|                                                 | Seven                                                                          | 0.20                                                                                                                                         |
|                                                 | Eight or more                                                                  | 0.00                                                                                                                                         |
| 5. Level of automation and miniaturization      | automatic, miniaturized                                                        | 1.00                                                                                                                                         |
|                                                 | semi-automatic, miniaturized                                                   | 0.75                                                                                                                                         |
|                                                 | manual, miniaturized                                                           | 0.50                                                                                                                                         |
|                                                 | automatic, not miniaturized                                                    | 0.50                                                                                                                                         |
|                                                 | semi-automatic, not miniaturized                                               | 0.25                                                                                                                                         |
|                                                 | manual, not miniaturized                                                       | 0.00                                                                                                                                         |
| 6. Derivatization status                        | No derivatization applied                                                      | 1.00                                                                                                                                         |
|                                                 | Derivatization applied                                                         | = $DA_1 \times DA_2 \times DA_3 \times \dots \times DA_n$<br>where $DA_i$ is the score corresponding to the particular derivatization agent. |
| 7. Amount of waste                              | 0.1 g (mL)                                                                     | 1.00                                                                                                                                         |
|                                                 | 10 g (mL)                                                                      | 0.40                                                                                                                                         |
|                                                 | 25 g (mL)                                                                      | 0.25                                                                                                                                         |
|                                                 | 100 g (mL)                                                                     | 0.10                                                                                                                                         |
|                                                 | Any other amount                                                               | = $-0.134 \times \ln$ (amount of waste in g or mL) + 0.6946                                                                                  |
|                                                 |                                                                                |                                                                                                                                              |
| 8. Number of analytes per hour                  | 1                                                                              | 0.00                                                                                                                                         |
|                                                 | 10                                                                             | 0.50                                                                                                                                         |
|                                                 | 50                                                                             | 0.90                                                                                                                                         |

|                                                                                                                                                        |                                                                          |                                                                                   |
|--------------------------------------------------------------------------------------------------------------------------------------------------------|--------------------------------------------------------------------------|-----------------------------------------------------------------------------------|
|                                                                                                                                                        | 70                                                                       | 1.00                                                                              |
|                                                                                                                                                        | Any other number of analytes                                             | = $0.2429 \times \ln$<br>(number of<br>analytes<br>determined in 1 h)<br>- 0.0517 |
| 9. Amount of energy per sample                                                                                                                         | <0.1 kWh                                                                 | 1.00                                                                              |
|                                                                                                                                                        | 0.1–1.5 kWh                                                              | 0.50                                                                              |
|                                                                                                                                                        | >1.5 kWh                                                                 | 0.00                                                                              |
| 10. Condition (toxic reagents)                                                                                                                         | No toxic reagents or solvents are used                                   | 1.00                                                                              |
|                                                                                                                                                        | Toxic reagents or solvents are used                                      | = $-0.156 \times \ln$<br>(amount of reagent<br>or solvent in g or<br>mL) + 0.5898 |
| 11. Condition (reagents obtained from renewable source)                                                                                                | No reagents are applied, or all are from bio-based sources               | 1.00                                                                              |
|                                                                                                                                                        | If some of them are derived from bio-based sources, while others are not | 0.50                                                                              |
|                                                                                                                                                        | None of the reagents originates from bio-based sources                   | 0.00                                                                              |
| 12. Threats (The threats shouldn't be toxic to aquatic life, bioaccumulative, persistent, highly flammable, highly oxidizable, explosive or corrosive) | All threats avoided                                                      | 1.00                                                                              |
|                                                                                                                                                        | One threat present                                                       | 0.80                                                                              |
|                                                                                                                                                        | Two threats present                                                      | 0.60                                                                              |
|                                                                                                                                                        | Three threats present                                                    | 0.40                                                                              |
|                                                                                                                                                        | Four threats present                                                     | 0.20                                                                              |
|                                                                                                                                                        | Five or more threats present                                             | 0.00                                                                              |

**Table S5** Comprehensive green analytical procedure index parameters description.

| Category                                                   | Description                                                                                 | Color  |
|------------------------------------------------------------|---------------------------------------------------------------------------------------------|--------|
| Yield (I)                                                  | >89%                                                                                        | Green  |
|                                                            | 70–89%                                                                                      | Yellow |
|                                                            | <70%                                                                                        | red    |
| Temperature/time (II)                                      | Room temperature, <1 h                                                                      | Green  |
|                                                            | Room temperature, > 1 h                                                                     | Yellow |
|                                                            | Heating, < 1 h<br>Cooling to 0 °C                                                           |        |
|                                                            | Heating, > 1 h<br>Cooling < 0 °C                                                            | Red    |
| Relation to the green economy<br>Number of rules met (III) | 5-6                                                                                         | Green  |
|                                                            | 3-4                                                                                         | Yellow |
|                                                            | 1-2                                                                                         | Red    |
| Reagents and solvents<br>Health hazard (IVa)               | Slightly toxic, slightly irritant; NFPA health hazard score is 0 or 1                       | Green  |
|                                                            | Moderately toxic; could cause temporary incapacitation; NFPA = 2 or 3                       | Yellow |
|                                                            | Serious injury on short-term exposure; known or suspected small animal carcinogen; NFPA = 4 | Red    |
| Reagents and solvents<br>Safety hazard (IVb)               | Highest NFPA flammability, instability score of 0 or 1. No special hazards                  | Green  |

|                                                  |                                                                                           |        |
|--------------------------------------------------|-------------------------------------------------------------------------------------------|--------|
|                                                  | Highest NFPA flammability or instability score is 2 or 3, or a special hazard is involved | Yellow |
|                                                  | Highest NFPA flammability or instability score is 4                                       | Red    |
| Instrumentation<br>Technical setup (Va)          | Common setup                                                                              | Green  |
|                                                  | Additional setups/semi-advanced instruments used                                          | Yellow |
|                                                  | Pressure equipment >1 atm; glove box                                                      | Red    |
| Instrumentation<br>Energy (Vb)                   | ≤0.1 kW h per sample                                                                      | Green  |
|                                                  | ≤1.5 kW h per sample                                                                      | Yellow |
|                                                  | >1.5 kW h per sample                                                                      | Red    |
| Instrumentation<br>Occupational hazard (Vc)      | Hermetization of the analytical process                                                   | Green  |
|                                                  | -                                                                                         | Yellow |
|                                                  | Emission of vapors to the atmosphere                                                      | Red    |
| Workup and purification of the end product (VIa) | None or simple processes                                                                  | Green  |
|                                                  | Application of standard purification techniques                                           | Yellow |
|                                                  | Application of advanced purification techniques                                           | Red    |
| Purity (VIb)                                     | >98%                                                                                      | Green  |
|                                                  | 97–98%                                                                                    | Yellow |
|                                                  | <97%                                                                                      | Red    |

**Table S6** AGREEprep tool parameters description.

| Category                                                           | Description                                                                             | Score                                                                              |
|--------------------------------------------------------------------|-----------------------------------------------------------------------------------------|------------------------------------------------------------------------------------|
| Criterion 1. Favor in situ sample preparation                      | <i>In-line/In situ</i>                                                                  | 1.00                                                                               |
|                                                                    | <i>On-line/In situ</i>                                                                  | 0.66                                                                               |
|                                                                    | <i>On-site</i>                                                                          | 0.33                                                                               |
|                                                                    | <i>Ex situ</i>                                                                          | 0.00                                                                               |
| Criterion 2. Use safer solvents and reagents                       | Solvent-free and reagent-less sample preparation procedures                             | 1.00                                                                               |
|                                                                    | >10mL or 10 g of hazardous solvents and reagents                                        | 0.00                                                                               |
|                                                                    | Any other amount                                                                        | $= -0.145 \times \ln$<br>(amount of hazardous substances in g or mL)<br>$+ 0.3333$ |
| Criterion 3. Target sustainable, reusable, and renewable materials | Only sustainable and renewable materials are used several times                         | 1.00                                                                               |
|                                                                    | > 75% of reagents and materials are sustainable or renewable                            | 0.75                                                                               |
|                                                                    | 50-75% of reagents and materials are sustainable or renewable and can only be used once | 0.50                                                                               |
|                                                                    | Materials are not sustainable or renewable and are used several times                   | 0.50                                                                               |
|                                                                    | 25-50% of reagents and materials are sustainable or renewable                           | 0.25                                                                               |
|                                                                    | < 25% of reagents and materials are sustainable or renewable and can only be used once  | 0.00                                                                               |
| Criterion 4. Minimize waste                                        | <0.1 g (mL)                                                                             | 1.00                                                                               |
|                                                                    | > 50.0 g (mL)                                                                           | 0.00                                                                               |
|                                                                    | Any other amount                                                                        | $= -0.161 \times \ln$<br>(sample mass or                                           |

|                                                                                              |                                                                                                                                                                                       |                                                                            |
|----------------------------------------------------------------------------------------------|---------------------------------------------------------------------------------------------------------------------------------------------------------------------------------------|----------------------------------------------------------------------------|
|                                                                                              |                                                                                                                                                                                       | volume in g or mL) +<br>0.6295                                             |
| Criterion 5. Minimize sample, chemical and material amounts                                  | Any amount                                                                                                                                                                            | = $-0.145 \times \ln$<br>(sample mass or<br>volume in g or mL) +<br>0.6667 |
| Criterion 6. Maximize sample throughput                                                      | Any amount                                                                                                                                                                            | = $0.2354 \times \ln$<br>(number of prepared<br>samples per hour)          |
| Criterion 7. Integrate steps and promote automation                                          | ≤2 steps                                                                                                                                                                              | 1.00                                                                       |
|                                                                                              | 3 steps                                                                                                                                                                               | 0.75                                                                       |
|                                                                                              | 4 steps                                                                                                                                                                               | 0.50                                                                       |
|                                                                                              | 5 steps                                                                                                                                                                               | 0.25                                                                       |
|                                                                                              | ≥6 steps                                                                                                                                                                              | 0.00                                                                       |
|                                                                                              | fully automated systems                                                                                                                                                               | 1.00                                                                       |
|                                                                                              | semi-automated systems                                                                                                                                                                | 0.50                                                                       |
|                                                                                              | manual systems                                                                                                                                                                        | 0.25                                                                       |
|                                                                                              | The final score for principle 7 is the product of both sub-scores.                                                                                                                    |                                                                            |
| Criterion 8. Minimize energy consumption                                                     | <10 Wh per sample                                                                                                                                                                     | 1.00                                                                       |
|                                                                                              | between 10 and 500 Wh per sample                                                                                                                                                      | = $-0.256 \times \ln$<br>(Wh/sample) + 1.5886                              |
|                                                                                              | >500 Wh per sample                                                                                                                                                                    | 0.00                                                                       |
| Criterion 9. Choose the greenest possible post-sample preparation configuration for analysis | Simple, readily available detection (information technology and communications equipment such as smartphones, desktop scanners, etc.)                                                 | 1.00                                                                       |
|                                                                                              | Molecular optical spectroscopic techniques (e.g. UV-vis spectrophotometry, fluorimetry, chemiluminescence, etc.), surface analysis techniques, voltammetry, potentiometry             | 0.75                                                                       |
|                                                                                              | Gas chromatography with non-mass spectrometry (MS) detection, atomic absorption spectroscopy, capillary electrophoresis                                                               | 0.50                                                                       |
|                                                                                              | Liquid chromatography (due to mobile phase consumption, usually being or containing organic solvents), gas chromatography with quadrupole mass spectrometric detection                | 0.25                                                                       |
|                                                                                              | Advanced mass spectrometry techniques (due to high energetic requirements), inductively coupled plasma-optical emission spectroscopy (ICP-OES), ICP-MS (due to noble gas consumption) | 0.00                                                                       |
| Criterion 10. Ensure safe procedures for the operator                                        | no hazards                                                                                                                                                                            | 1.00                                                                       |
|                                                                                              | 1 hazard                                                                                                                                                                              | 0.75                                                                       |
|                                                                                              | 2 hazards                                                                                                                                                                             | 0.50                                                                       |
|                                                                                              | 3 hazards                                                                                                                                                                             | 0.25                                                                       |
|                                                                                              | 4 or more hazards                                                                                                                                                                     | 0.00                                                                       |
