# Supplementary figures and images for: Greener chemistry in analytical sciences: from green solvents to applications in complex matrices. Current challenges and future perspectives: a critical review
Source: Royal Society of Chemistry journal article supplement (doi:10.1039/d3an00498h), 2023-01-01

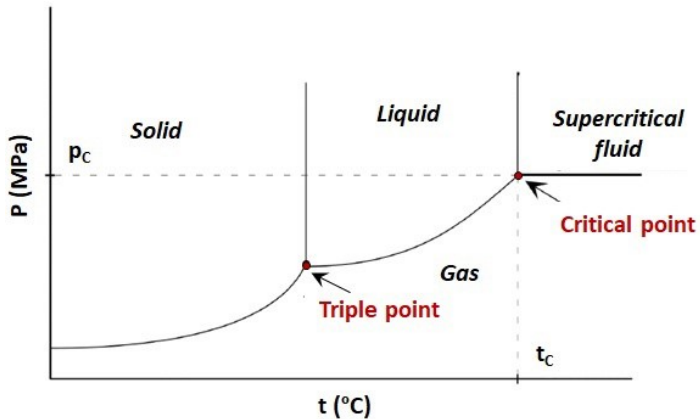

Supplement: d3an00498h2.pdf [file d3an00498h2.pdf]
